# Supplementary material for: Particulate matter monitoring and source apportionment inside and outside schools in a Global South metropolis
Source: Royal Society of Chemistry journal article supplement (doi:10.1039/d5ea00096c), 2025-12-02
Supplement: d5ea00096c1.pdf [file d5ea00096c1.pdf]

## SUPPLEMENTARY MATERIAL

### Particulate matter monitoring and source apportionment of inside and outside schools in Port Harcourt, Nigeria

Vitalis Nwokorie<sup>1</sup>, Dimitris Bousiotis<sup>1</sup> and Francis D. Pope<sup>1\*</sup>

<sup>1</sup>School of Geography, Earth and Environmental Sciences, University of Birmingham, Birmingham, UK

\*Corresponding Author – Francis D. Pope. School of Geography, Earth and Environmental Sciences, University of Birmingham, Birmingham, B15 2TT, UK. Email address: [f.pope@bham.ac.uk](mailto:f.pope@bham.ac.uk)

#### Figure List

Figure S1. Trends in PM<sub>1</sub> mass concentrations for all studied schools, both inside and outside the school, for both seasons.  
Figure S2. Trends in PM<sub>2.5</sub> mass concentrations for all studied schools, both inside and outside the school, for both seasons  
Figure S3. Trends in PM<sub>10</sub> mass concentrations for all studied schools, both inside and outside the school, for both seasons.  
Figure S4. Polar of the contribution of the regional factors (factor 1 and factor 2) for the rainy season for all three schools studied.

#### Table List

Table S1. Distances between monitoring sites and individually identified pollution sources.

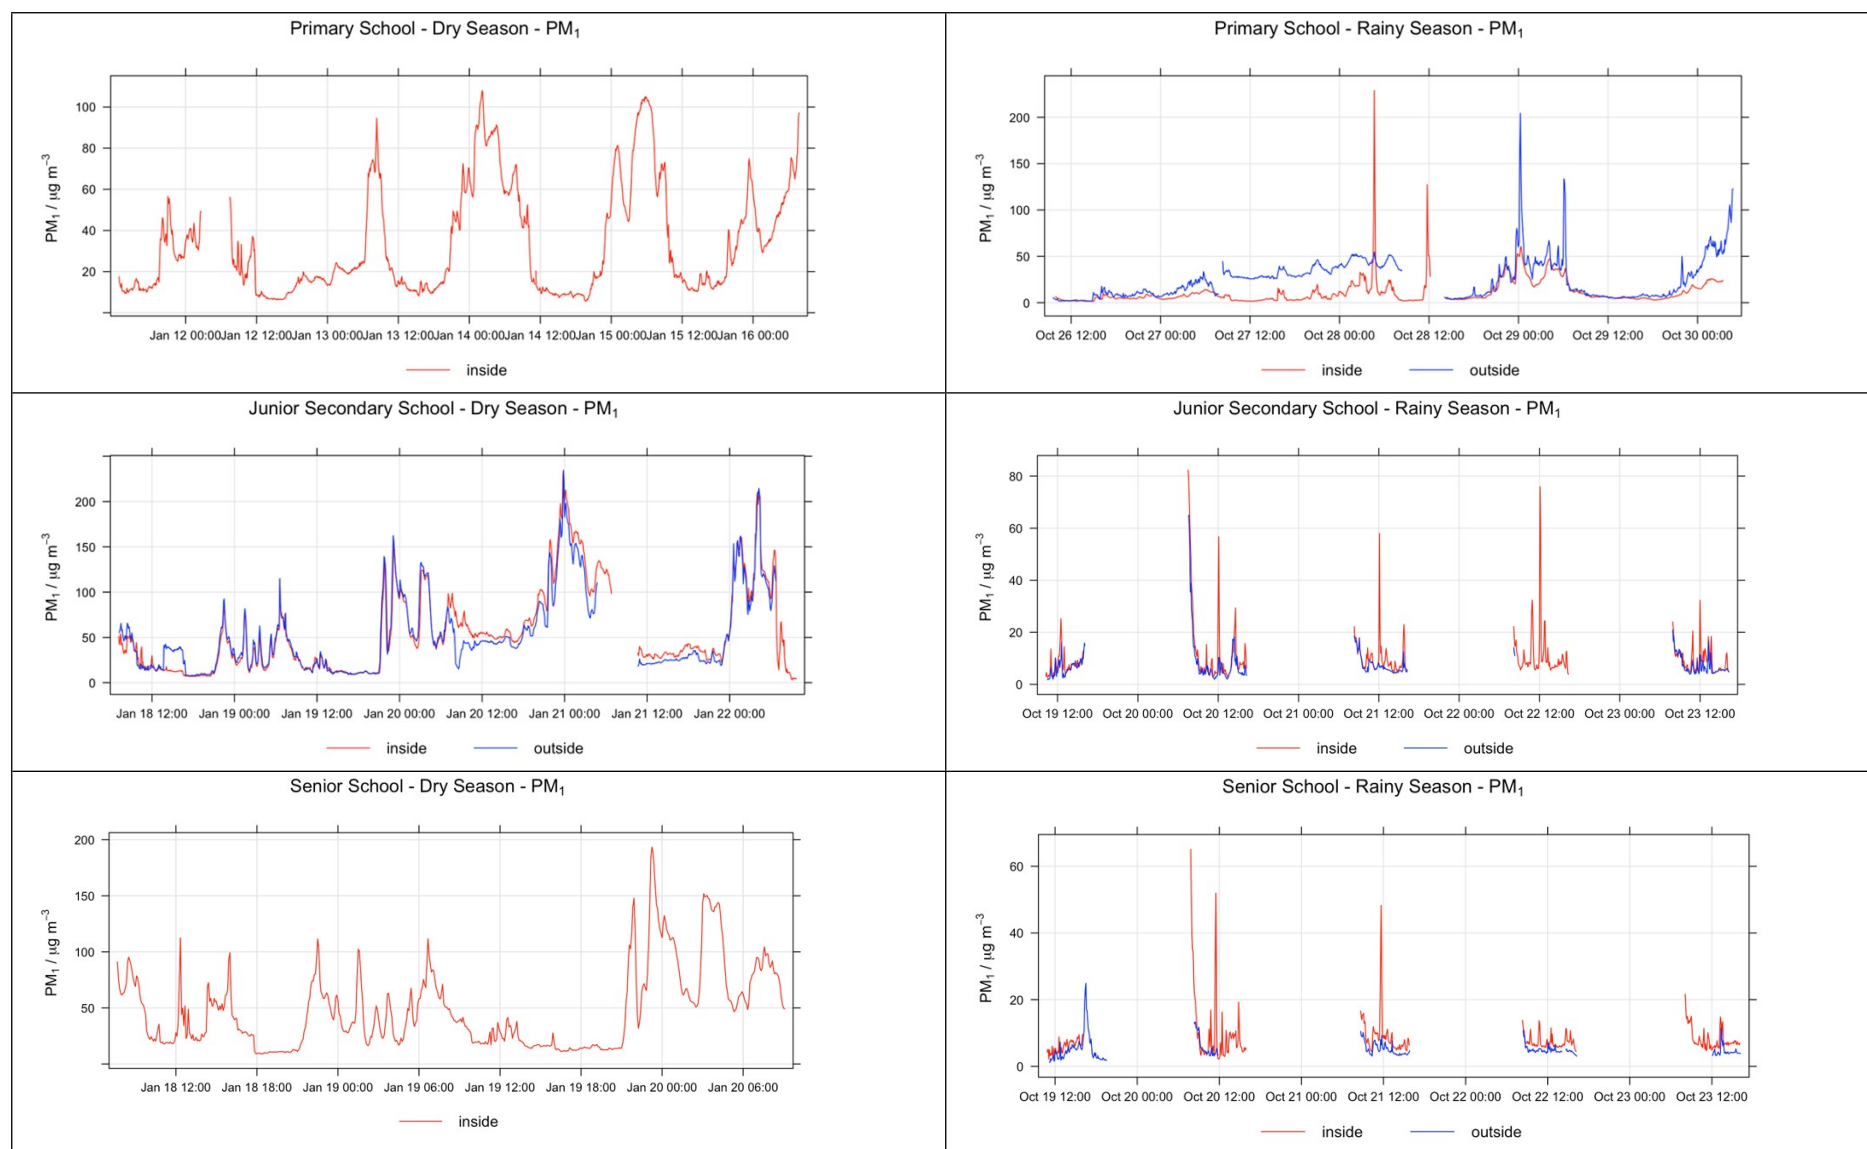

Figure S1. Trends in PM<sub>1</sub> mass concentrations for all studied schools, both inside and outside the school, for both seasons.

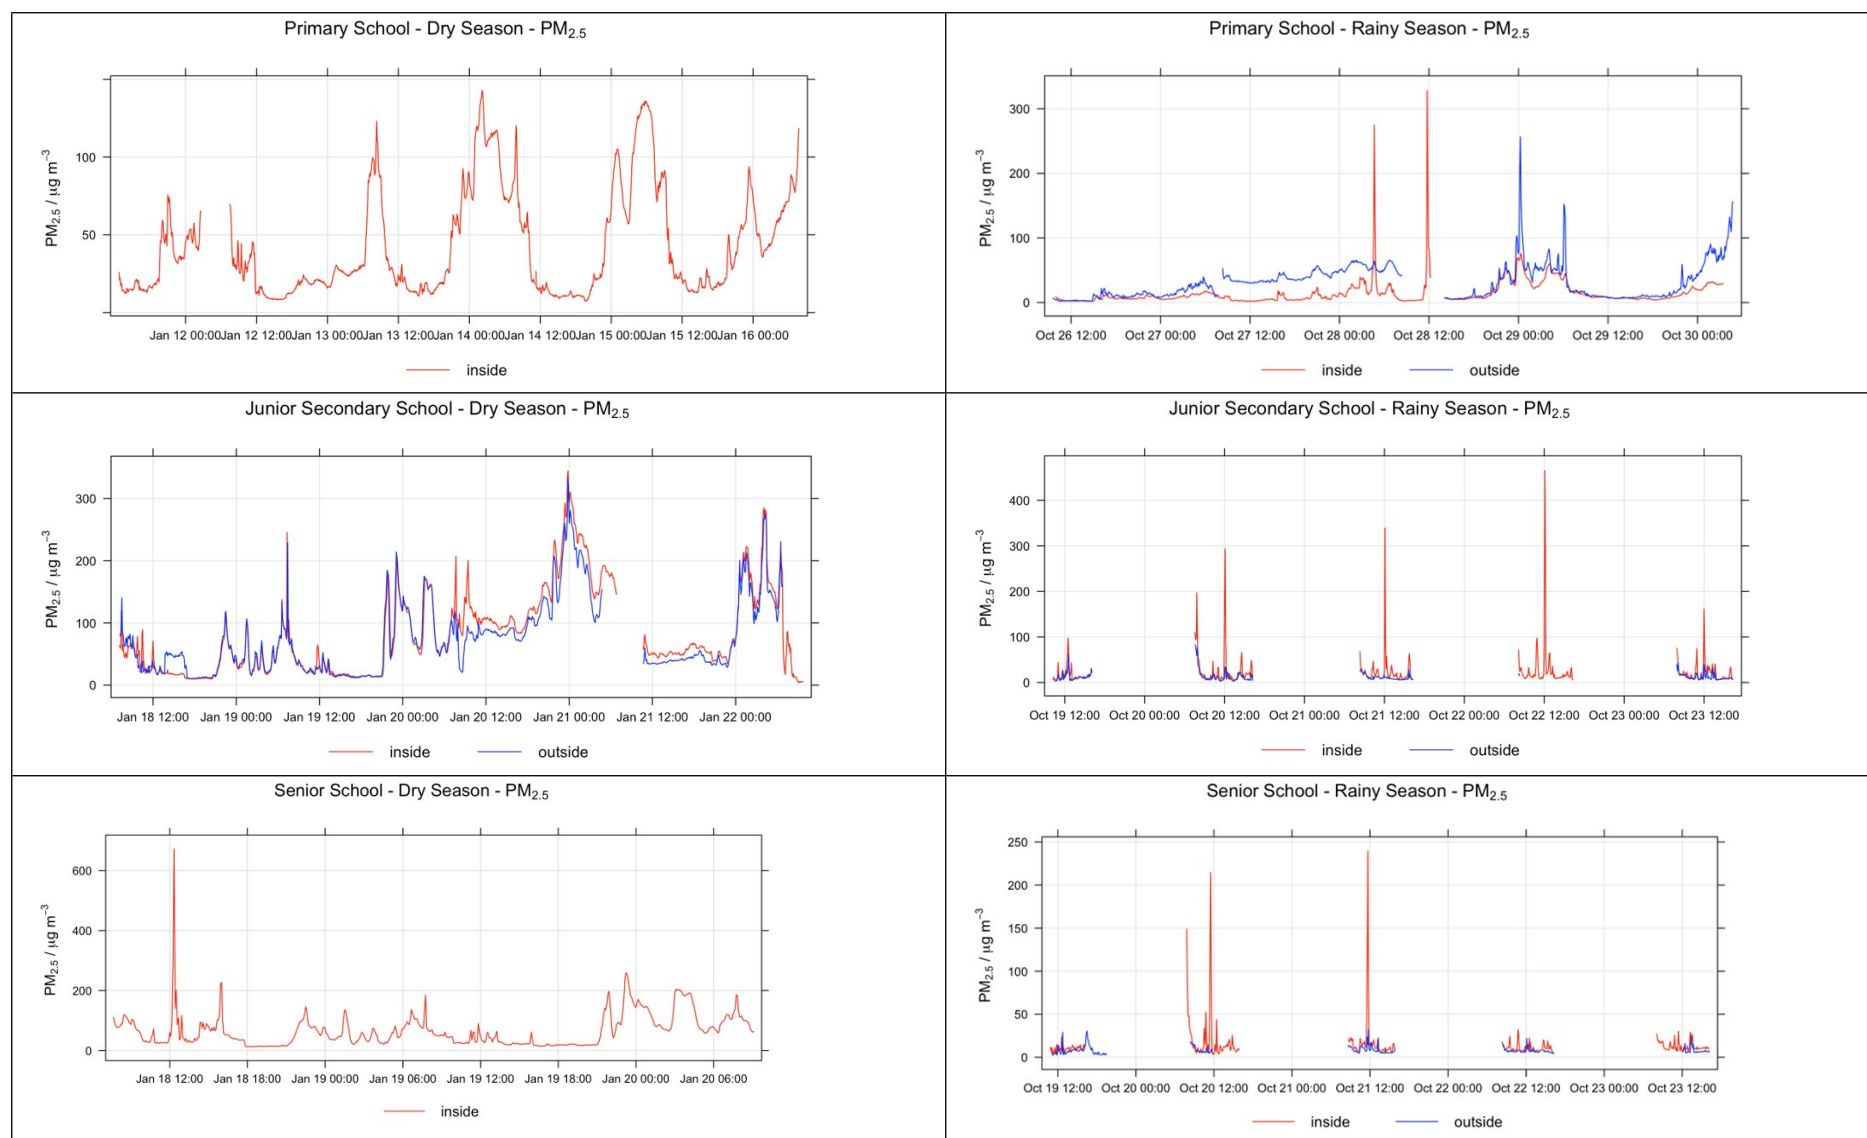

Figure S2. Trends in PM<sub>2.5</sub> mass concentrations for all studied schools, both inside and outside the school, for both seasons

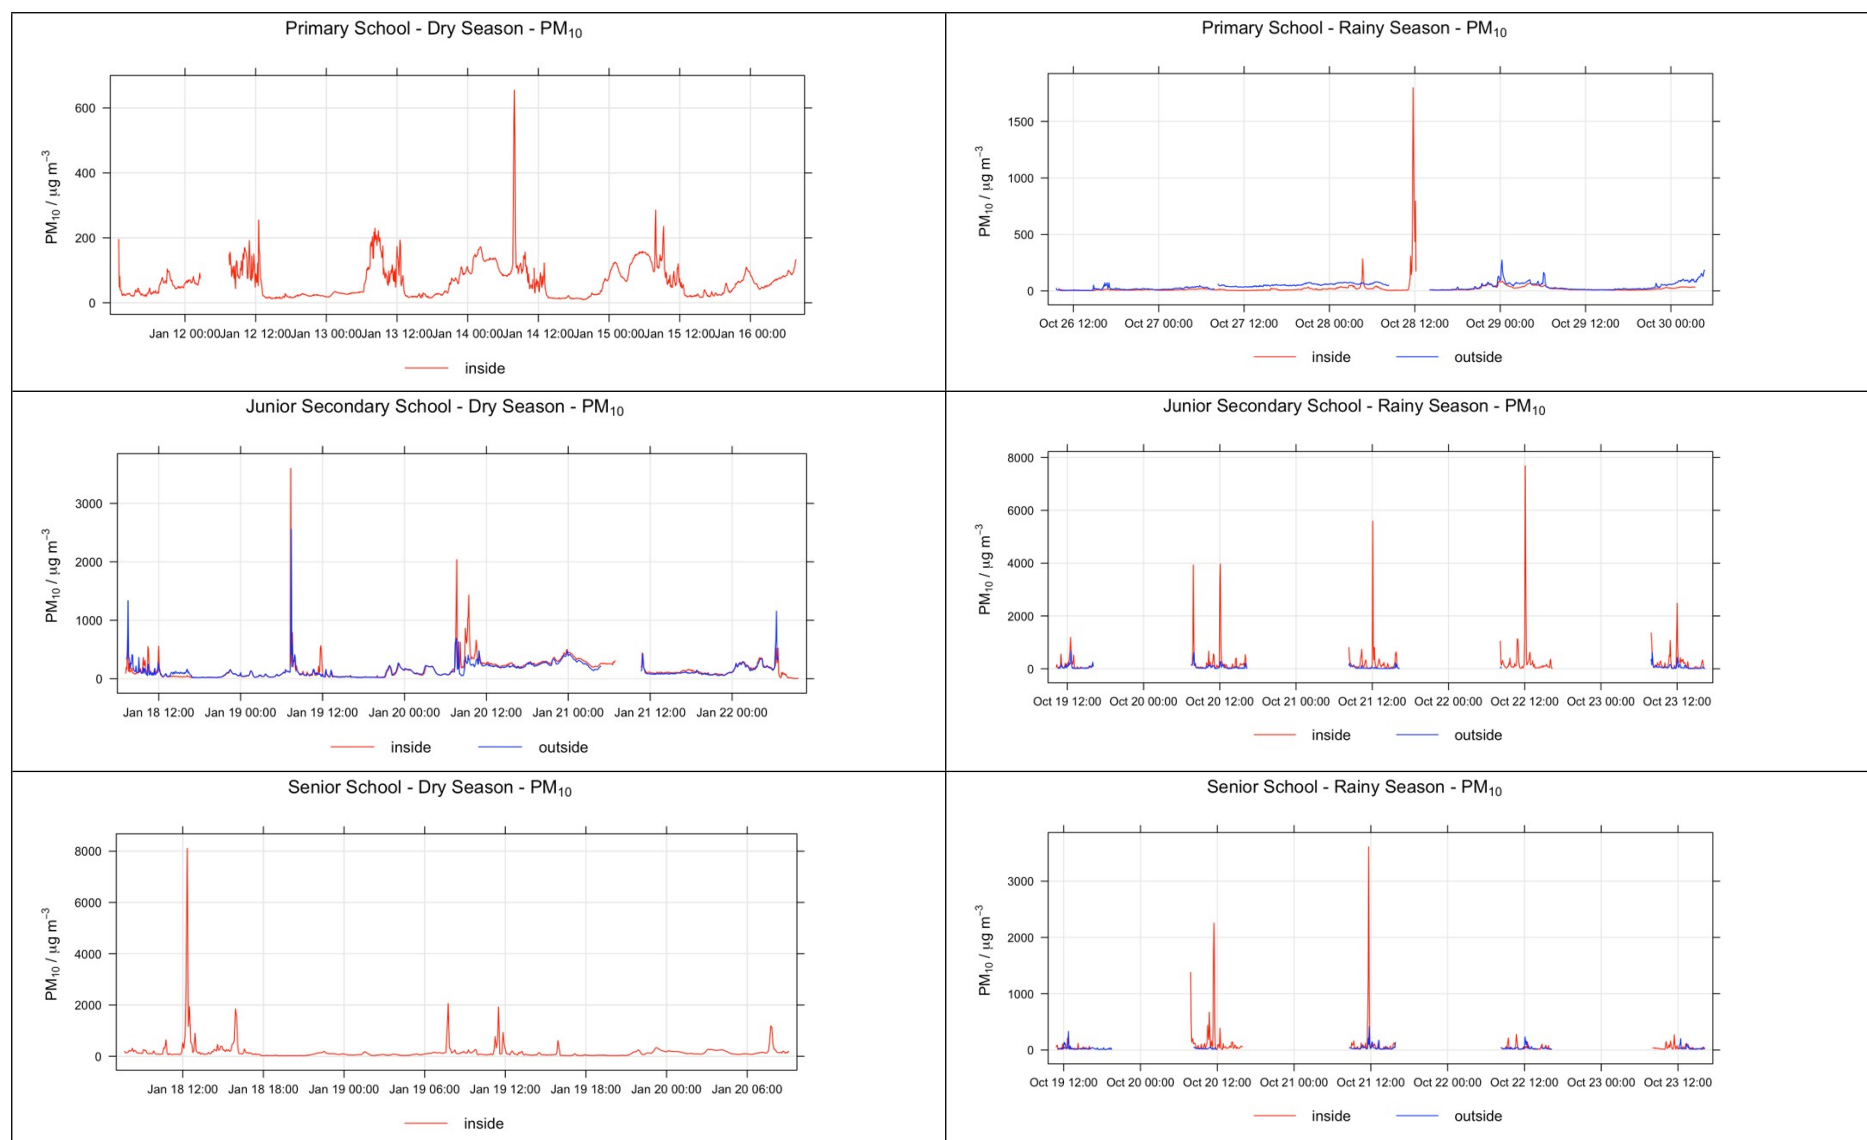

Figure S3. Trends in PM<sub>10</sub> mass concentrations for all studied schools, both inside and outside the school, for both seasons.

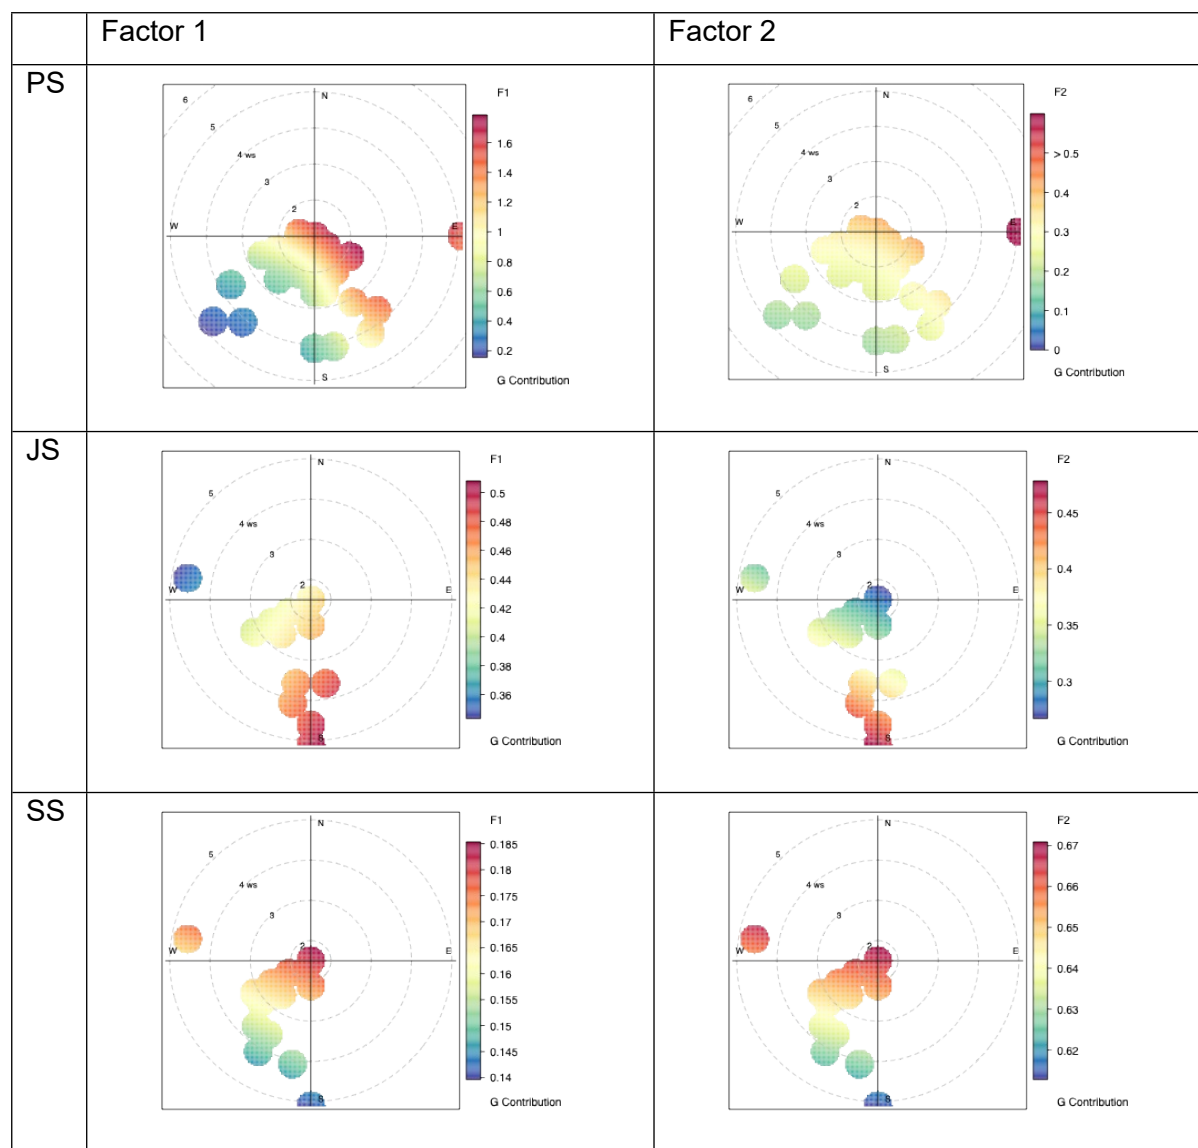

Figure S4. Polar of the contribution of the regional factors (factor 1 and factor 2) for the rainy season for all three schools studied.

Table S1. Distances between monitoring sites and individually identified pollution sources.

| Sources                                                                      | PS (m) | JS (m) | SS (m) |
|------------------------------------------------------------------------------|--------|--------|--------|
| Boat Jetty                                                                   | 327    | 1020   | 1100   |
| Cement Blocks Factory                                                        | 854    | 215    | 98     |
| Diesel powered electric generator                                            | 828    | 189    | 130    |
| High Density Neighbourhood                                                   | 143    | 137    | 180    |
| Major Road                                                                   | 614    | 7      | 69     |
| Primary School Playground                                                    | 23     | 720    | 784    |
| Secondary School Playground (Car parking space for drop-off/pick-up)         | 700    | 37     | 21     |
| Smoke from combustion (suspected artisan refining, locally called "Kpo-fire" | 545    | 240    | 96     |
